# Supplementary material
Source: ML conference proceedings conference paper supplement (https://openaccess.thecvf.com/content/ICCV_2017/html/Perina_Summarization_and_Classification_ICCV_2017_paper.html)
Supplement: Supplementary file 3 [file Perina_Summarization_and_Classification_ICCV_2017_supplemental.zip]

Archive with 4 entries (4 files):
- main.pdf
- video_plus_highRes/CGembedding.jpg
- video_plus_highRes/TheAmericanDream.avi
- video_plus_highRes/tSNE.pdf
