# Supplementary material
Source: ML conference proceedings conference paper supplement (https://openaccess.thecvf.com/content/ICCV_2017/html/Perina_Summarization_and_Classification_ICCV_2017_paper.html)

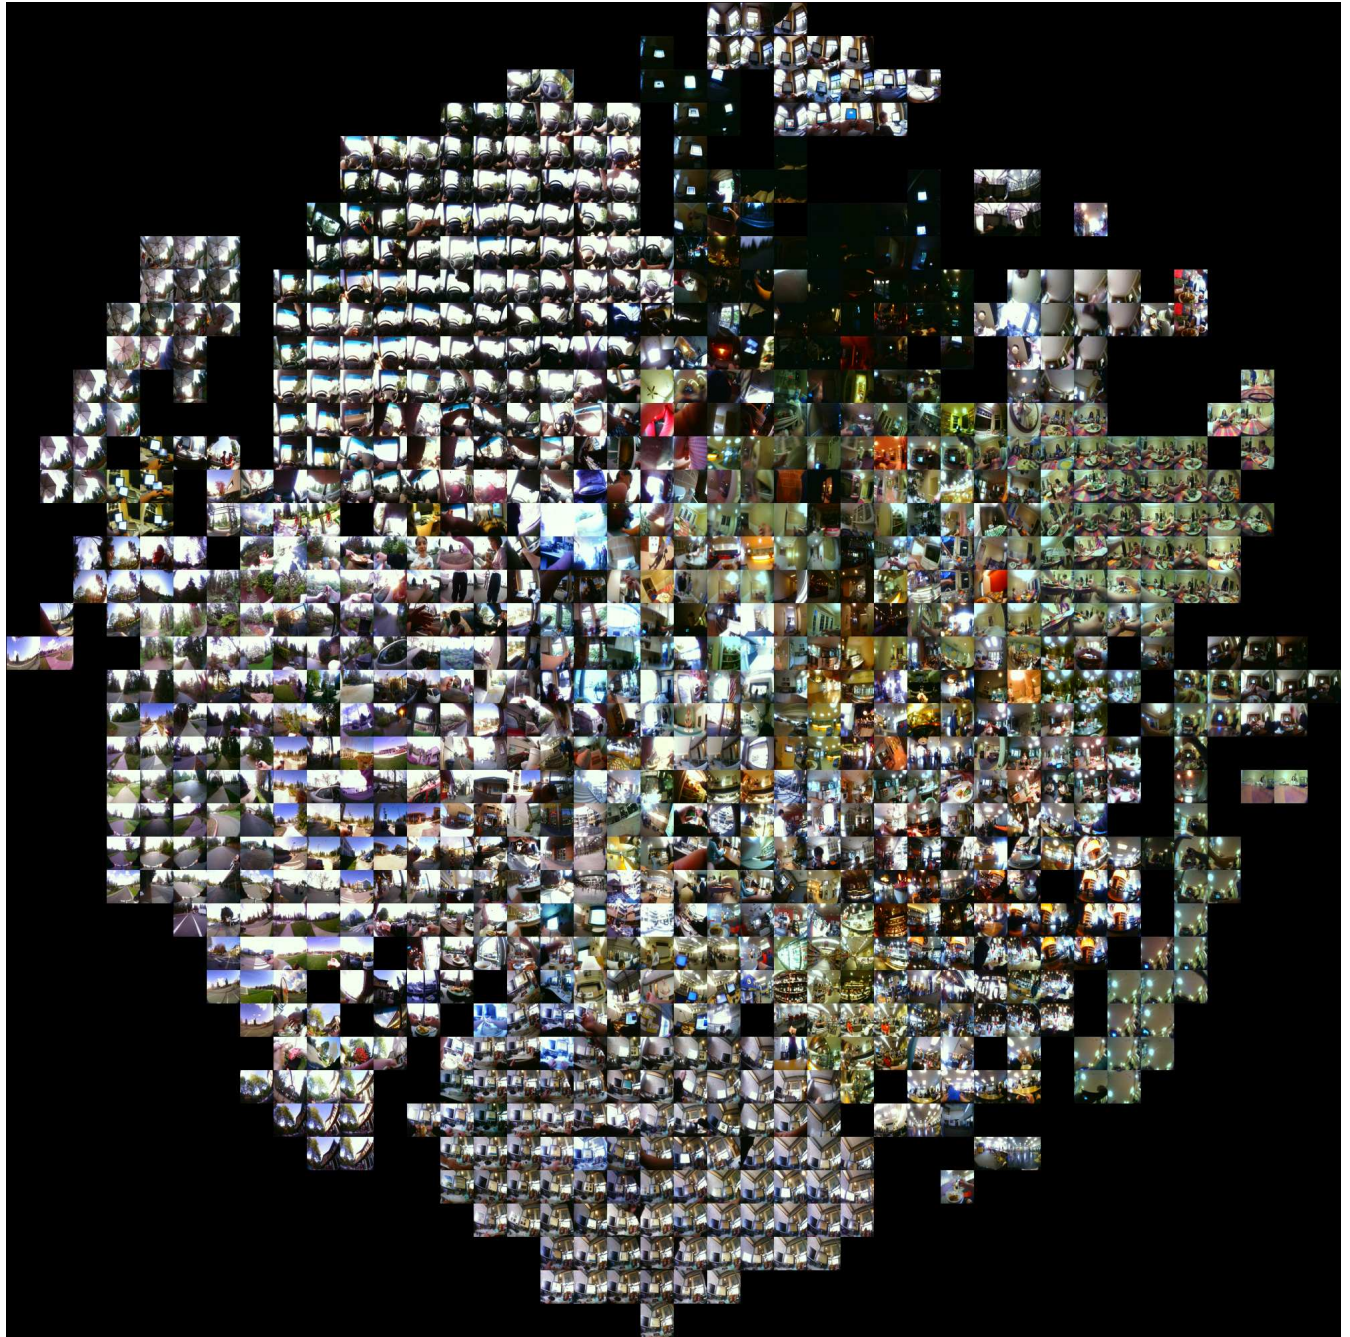

Supplement: Supplementary file 2 [file Perina_Summarization_and_Classification_ICCV_2017_supplemental.zip]
